# Supplementary material for: Development of an automated manufacturing process for large-scale production of autologous T cell therapies
Source: PubMed Central journal article supplement — Mol Ther Methods Clin Dev. 2023 Sep 16;31:101114. doi: 10.1016/j.omtm.2023.101114 (PMC10544074; doi:10.1016/j.omtm.2023.101114), 2023-09-16
Supplement: mmc1.pdf [file mmc1.pdf]

**OMTM, Volume 31**

**Supplemental information**

**Development of an automated manufacturing  
process for large-scale production  
of autologous T cell therapies**

**Natalie Francis, Marion Braun, Sarah Neagle, Sabine Peiffer, Alexander Bohn, Alexander Rosenthal, Tanita Olbrich, Sophia Lollies, Keijo Ilsmann, Carola Hauck, Bernhard Gerstmayer, Silvio Weber, and Aileen Kirkpatrick**

## Supplemental Information

**Table S1 Summary of Flow Cytometry Panels Used to Assess T Cell Phenotype At Different Timepoints**

| Panel                         | Timepoints      | Marker                         | Fluorophore | Supplier        |
|-------------------------------|-----------------|--------------------------------|-------------|-----------------|
| Cell Count/Viability          | D1, D5, D7, D12 | 7AAD                           | N/A         | BD Biosciences  |
| Cellular Composition (Purity) | D0              | CD45                           | VioBlue     | Miltenyi Biotec |
|                               |                 | CD4                            | VioGreen    | Miltenyi Biotec |
|                               |                 | CD3                            | FITC        | Miltenyi Biotec |
|                               |                 | CD56/CD16                      | PE          | Miltenyi Biotec |
|                               |                 | 7AAD                           | N/A         | BD Biosciences  |
|                               |                 | CD19                           | PE-Vio770   | Miltenyi Biotec |
|                               |                 | CD14                           | APC         | Miltenyi Biotec |
| Exhaustion                    | D0, D7, D12     | CD8                            | APC-Vio770  | Miltenyi Biotec |
|                               |                 | CD223 (LAG3)                   | VioBlue     | Miltenyi Biotec |
|                               |                 | CD4                            | VioGreen    | Miltenyi Biotec |
|                               |                 | CD3                            | FITC        | Miltenyi Biotec |
|                               |                 | 7AAD                           | N/A         | BD Biosciences  |
|                               |                 | CD279 (PD-1)                   | PE-Vio770   | Miltenyi Biotec |
|                               |                 | CD366 (TIM3)                   | APC         | Miltenyi Biotec |
| Memory                        | D0, D7, D12     | CD8                            | APC-Vio770  | Miltenyi Biotec |
|                               |                 | CCR7                           | VioBlue     | Miltenyi Biotec |
|                               |                 | CD4                            | VioGreen    | Miltenyi Biotec |
|                               |                 | CD3                            | FITC        | Miltenyi Biotec |
|                               |                 | 7AAD                           | N/A         | BD Biosciences  |
|                               |                 | CD45RA                         | PE-Vio770   | Miltenyi Biotec |
|                               |                 | CD95                           | APC         | Miltenyi Biotec |
| Activation                    | D0, D1, D7, D12 | CD8                            | APC-Vio770  | Miltenyi Biotec |
|                               |                 | CD4                            | VioBlue     | Miltenyi Biotec |
|                               |                 | CD8                            | VioGreen    | Miltenyi Biotec |
|                               |                 | CD25                           | PE          | Miltenyi Biotec |
|                               |                 | 7AAD                           | N/A         | BD Biosciences  |
|                               |                 | CD69                           | APC         | Miltenyi Biotec |
| Transduction Efficiency       | D7, D12         | CD3                            | APC-Vio770  | Miltenyi Biotec |
|                               |                 | 7AAD                           | N/A         | BD Biosciences  |
|                               |                 | CD4                            | VioGreen    | Miltenyi Biotec |
|                               |                 | CD3                            | FITC        | Miltenyi Biotec |
|                               |                 | TCR peptide-specific dextramer | PE          | Immudex         |
|                               |                 | CD8                            | APC-Vio770  | Miltenyi Biotec |

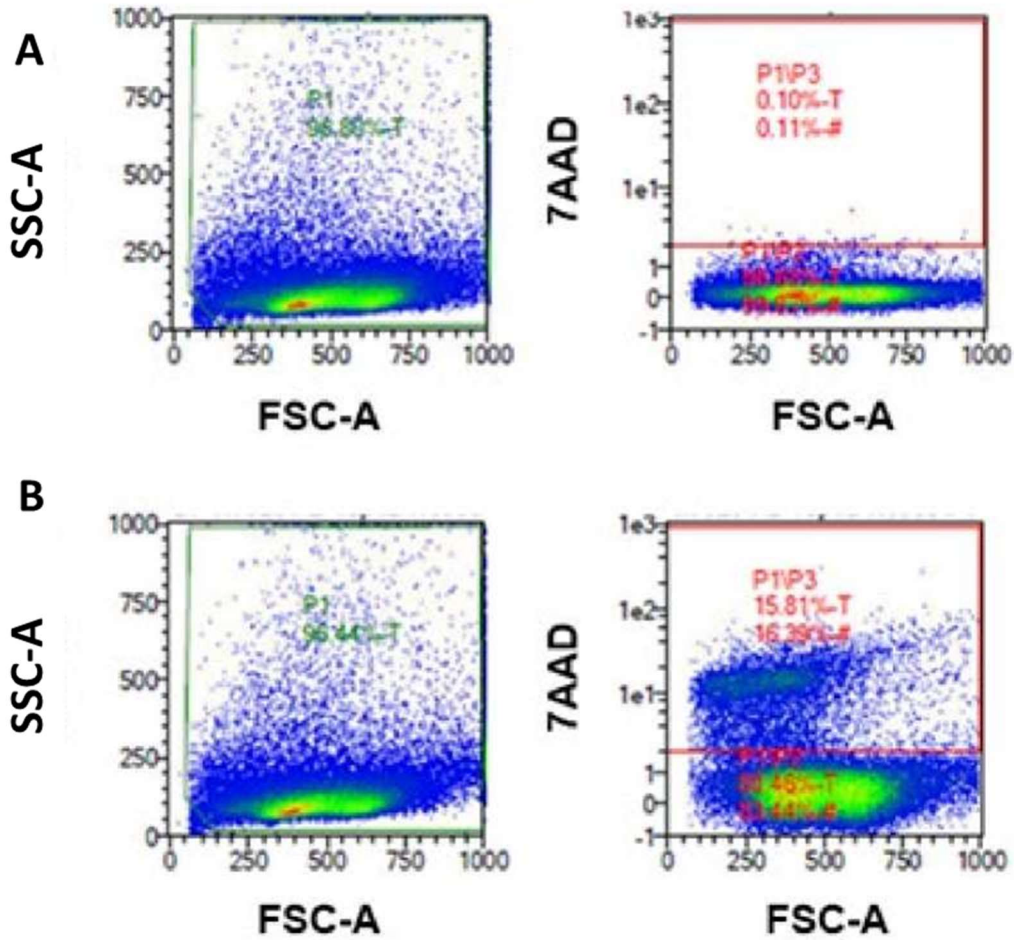

**Figure S1 Gating strategy for Cell Count and Viability Panel.** (A) Unstained control. (B) 7-AAD stained sample. The first gate (left) finds events the approximate size of T cells, the second gate (right) finds viable cells among these cells.

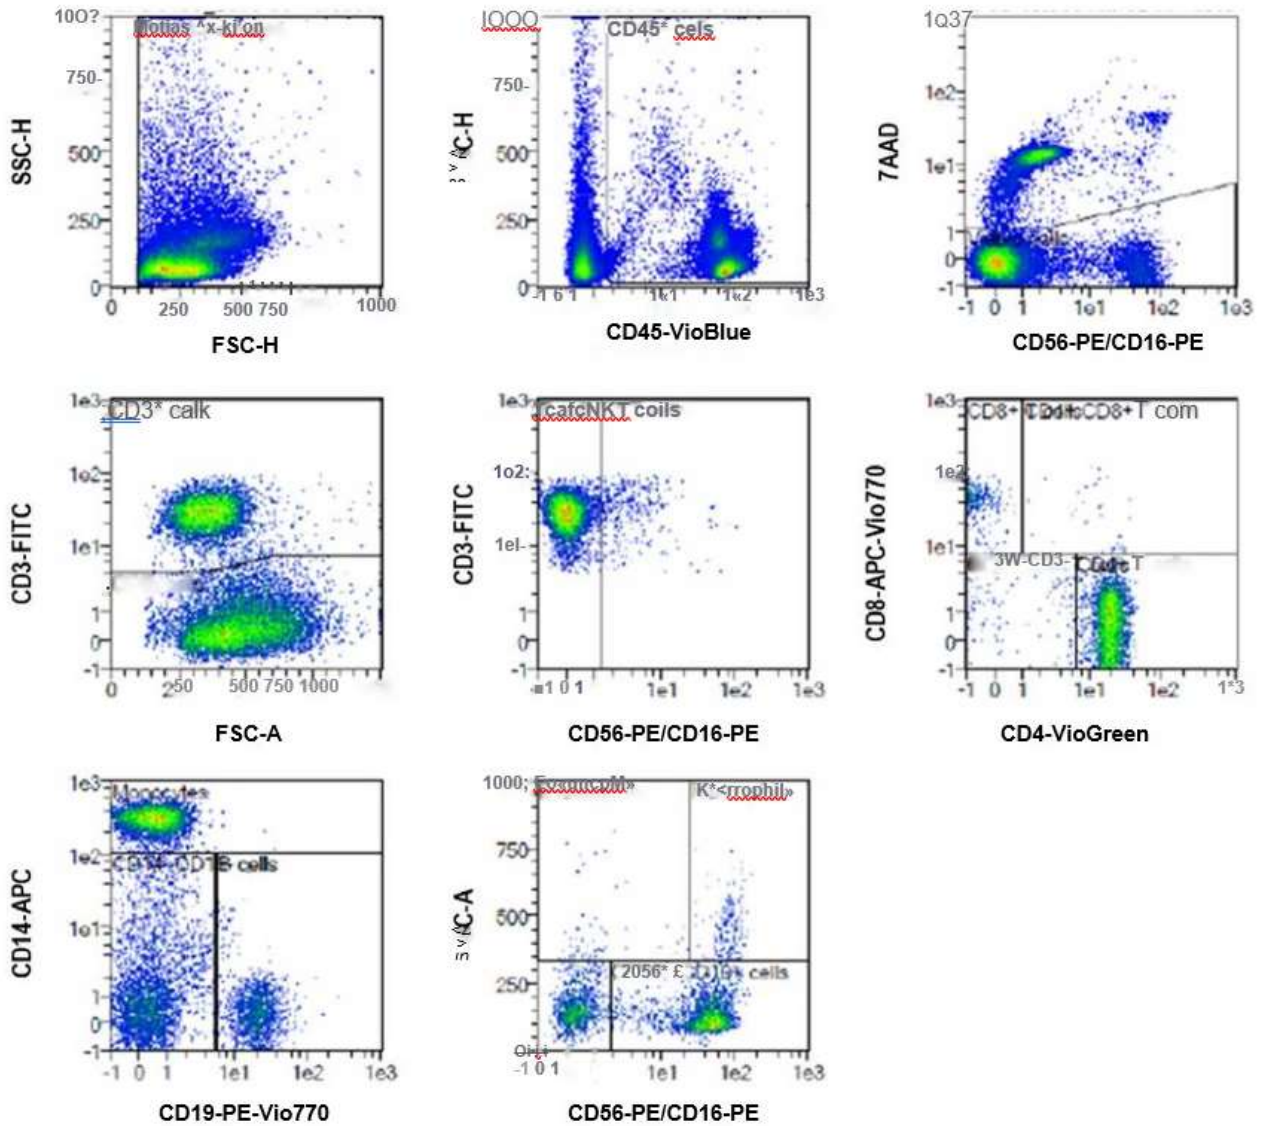

**Figure S2 Gating Strategy for Cellular Composition Panel for Evaluation of T Cells and Other Immune Cell Types.** The first gate (top left) excludes debris and red blood cells. The second gate (top centre) identifies CD45+ cells within the debris exclusion gate. The third plot identifies viable cells among CD45+ cells. The fourth plot (centre left) identifies CD3+ cells among viable cells. The fifth plot (centre) identifies T cells and NKT cells. The sixth plot (centre right) identifies CD4 and CD8 positive and negative populations within the T cell population. The seventh plot (bottom left) identifies monocytes and B cells within CD3+ cells. The eighth plot (bottom centre) identifies eosinophils and neutrophils among CD14-/CD19-cells.

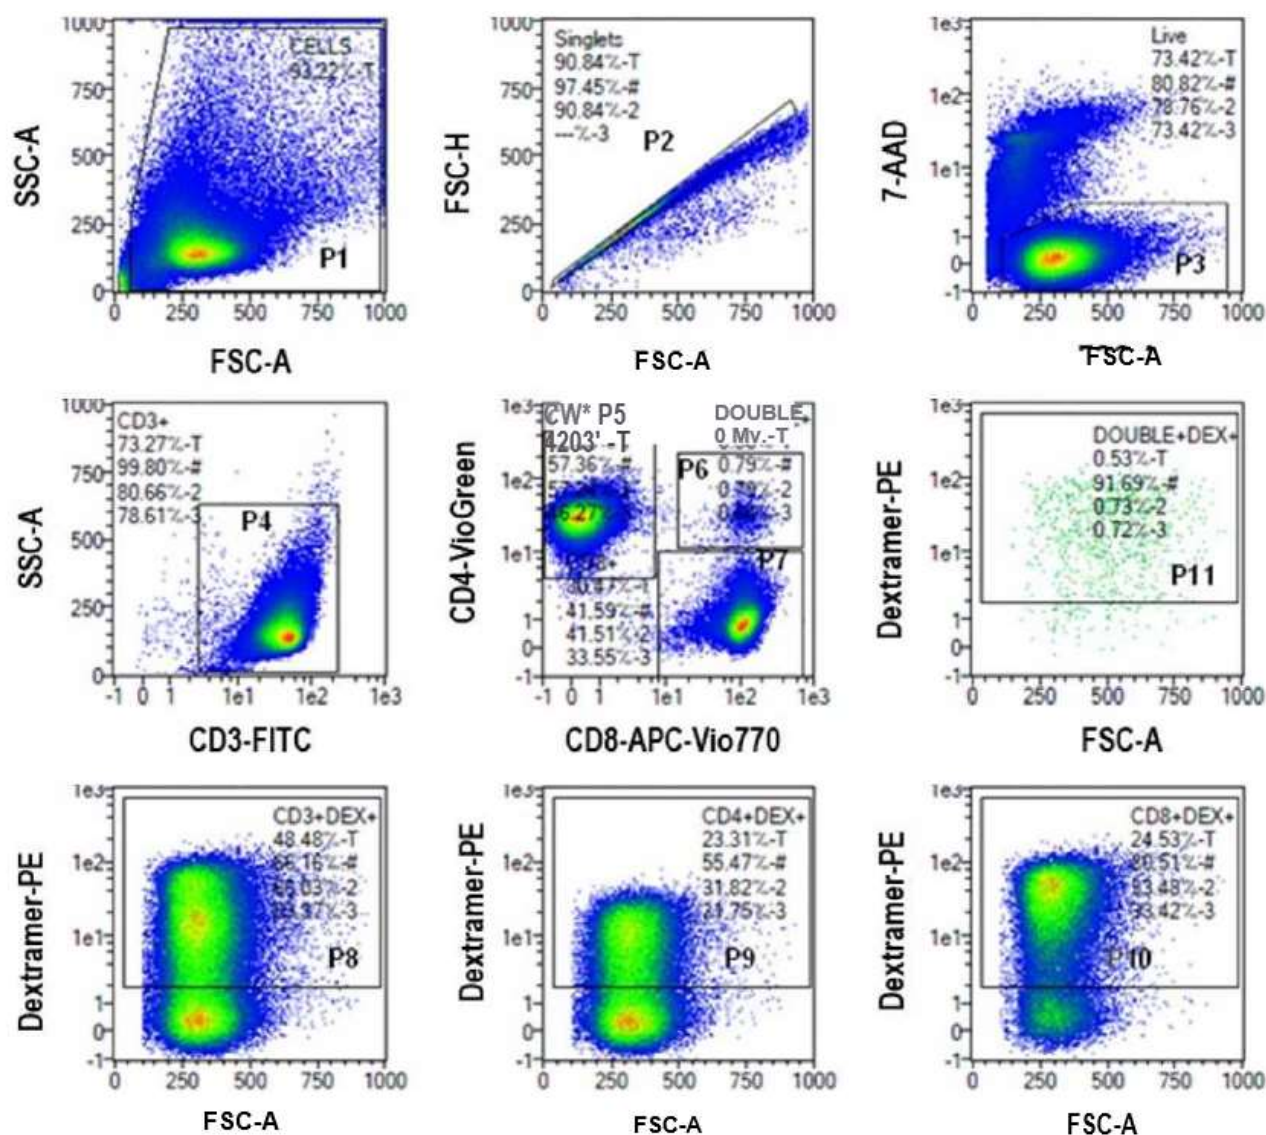

**Figure S3 Gating strategy for Transduction Efficiency Panel.** The first gate (top left) identifies cells. The second gate (top centre) identifies single cells. The third plot (top right) identifies viable cells. The fourth plot (centre left) identifies CD3+ cells. The fifth plot (centre) identifies CD4 and CD8 positive and negative populations within the T cell population. The sixth plot (centre right) identifies transduced cells within the CD4+/CD8+ population. The seventh plot (bottom left) identifies transduced cells within the CD3+ population. The eighth plot (bottom centre) identifies transduced cells within the CD4+ population. The ninth plot (bottom right) identifies transduced cells within the CD8+ population.



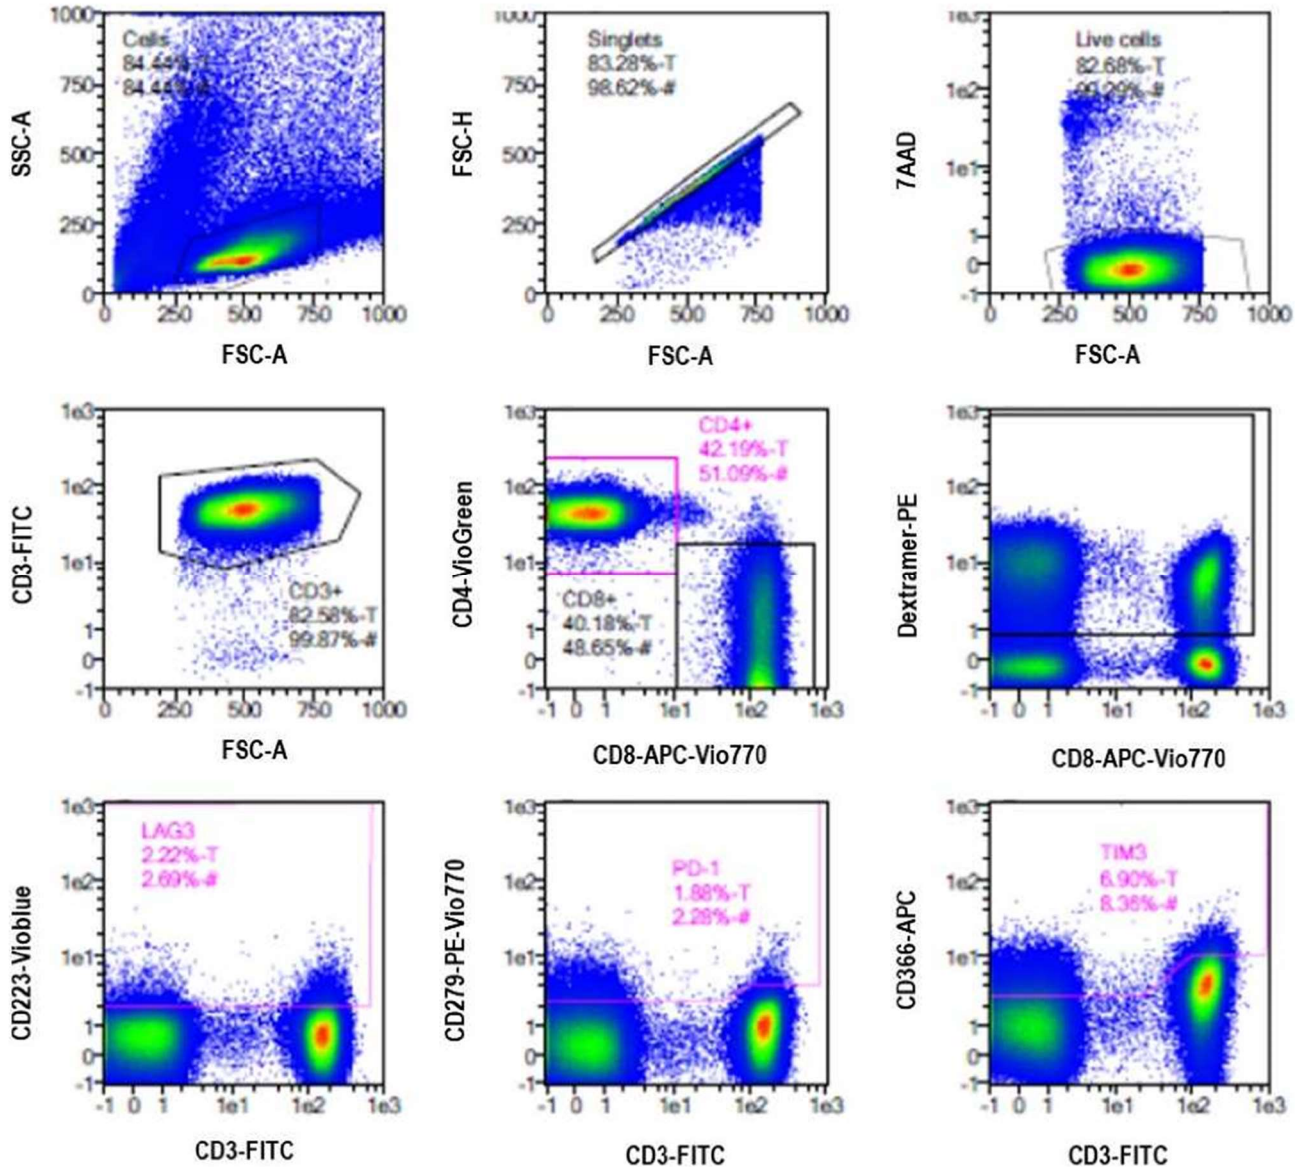

**Figure S4 Gating Strategy for Exhaustion Panel.** The first gate (top left) identifies cells. The second gate (top centre) identifies single cells. The third plot (top right) identifies viable cells. The fourth plot (centre left) identifies CD3+ cells. The fifth plot (centre) identifies CD4 and CD8 positive and negative populations within the T cell population. The sixth plot (centre right) identifies transduced cells within the CD4+/CD8+ population. The seventh plot (bottom left) identifies transduced cells within the CD3+ population. The eighth plot (bottom centre) identifies transduced cells within the CD4+ population. The ninth plot (bottom right) identifies transduced cells within the CD8+ population.

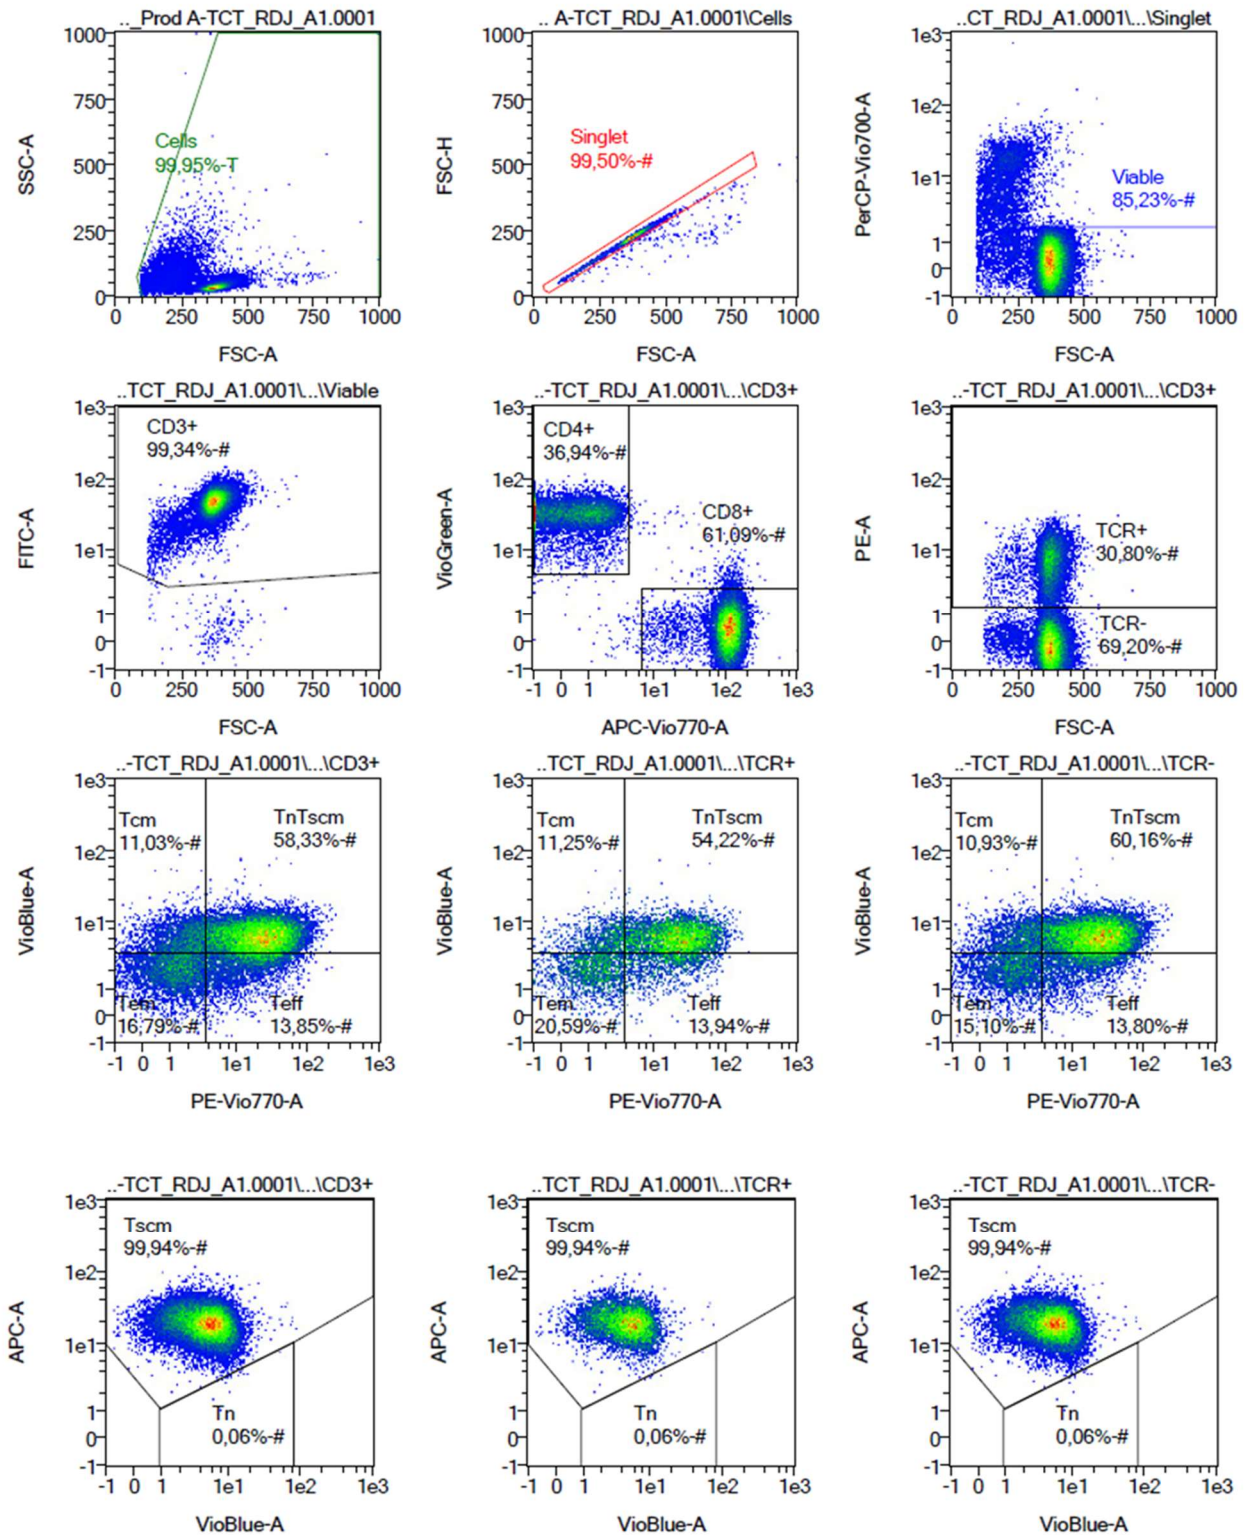

**Figure S5 Gating Strategy for Differentiation Panel for Evaluation of T Cell Memory Subsets.** The first gate (top left) identifies cells. The second gate (top centre) identifies single cells. The third plot (top right) identifies viable cells. The fourth gate (centre left) identifies CD3+ cells. The fifth plot (centre) identifies CD4 and CD8 positive and negative populations within the T cell population. The sixth plot (centre right) identifies transduced (TCR+) and non-transduced (TCR-) cells within the CD3+ population. The seventh, eighth and ninth plots (second row from bottom) identifies TCM, TEM and TEFF sub-populations within the CD3+, TCR+ and TCR- populations respectively. The tenth, eleventh, and twelfth plots identify TSCM and TN sub-populations within the CD3+, TCR+ and TCR- populations, respectively.

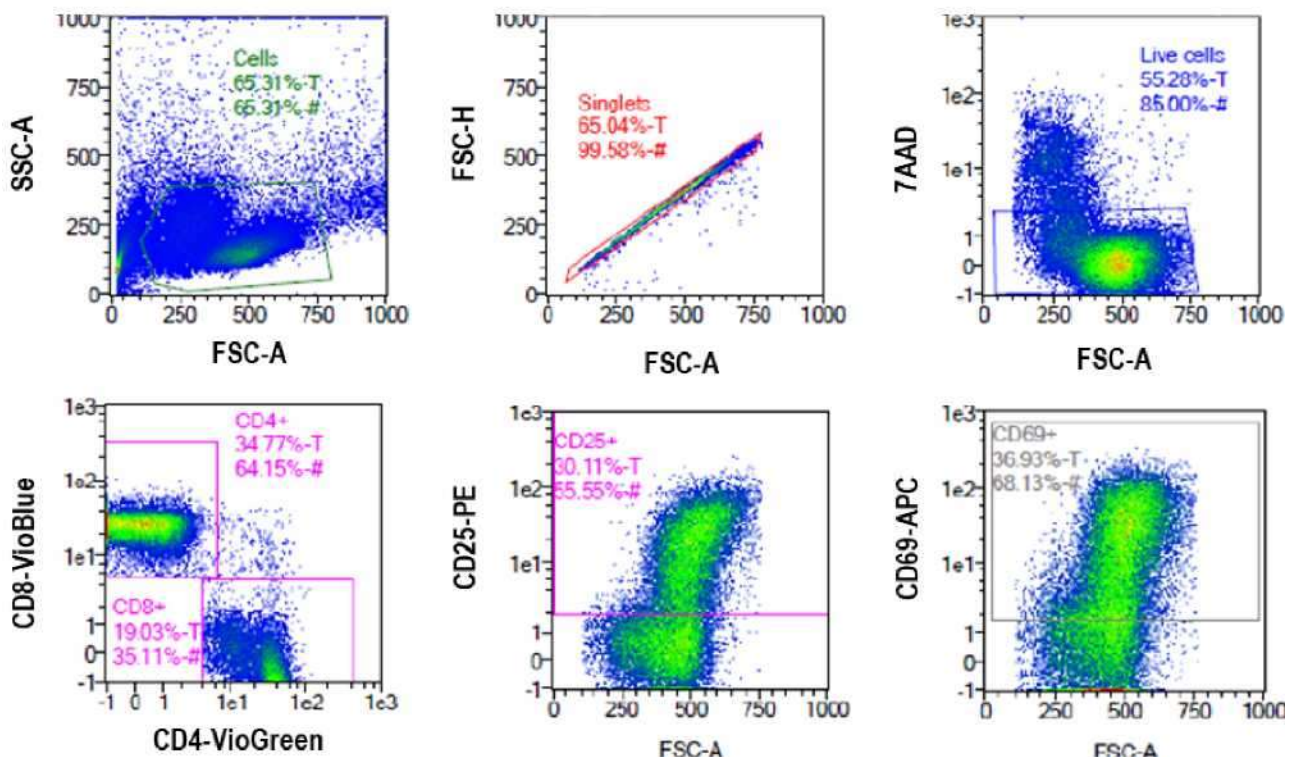

**Figure S6 Gating Strategy for Activation Panel.** The first gate (top left) identifies cells. The second gate (top centre) identifies single cells. The third plot (top right) identifies viable cells. The fourth plot (bottom left) identifies CD4+ and CD8+ cells. The fifth plot (bottom centre) identifies CD25+ cells. The sixth plot (bottom right) identifies CD69+ cells.



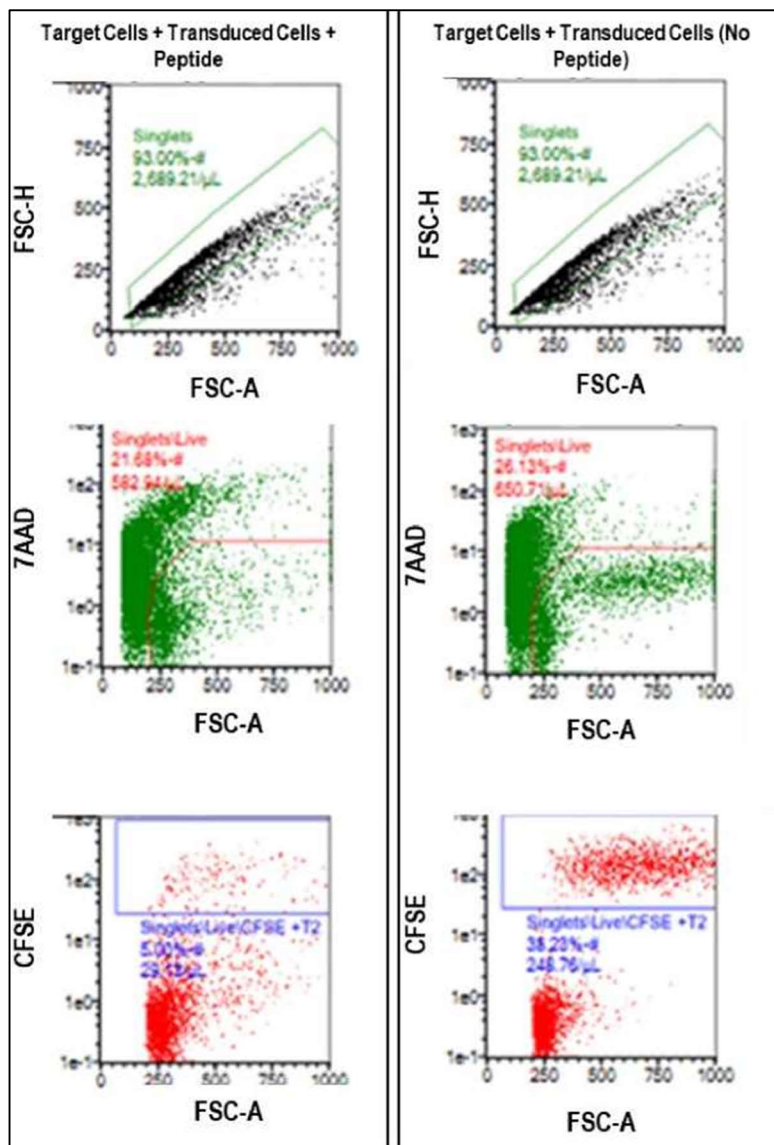

**Figure S7 Gating strategy for cytotoxicity assay.** Left panel: target cells + transduced cells + peptide. Right panel: No-peptide control. Top gate identifies singlets. Centre gate identifies viable cells within singlets. Bottom gates identify CFSE-labelled target cells within viable cells.

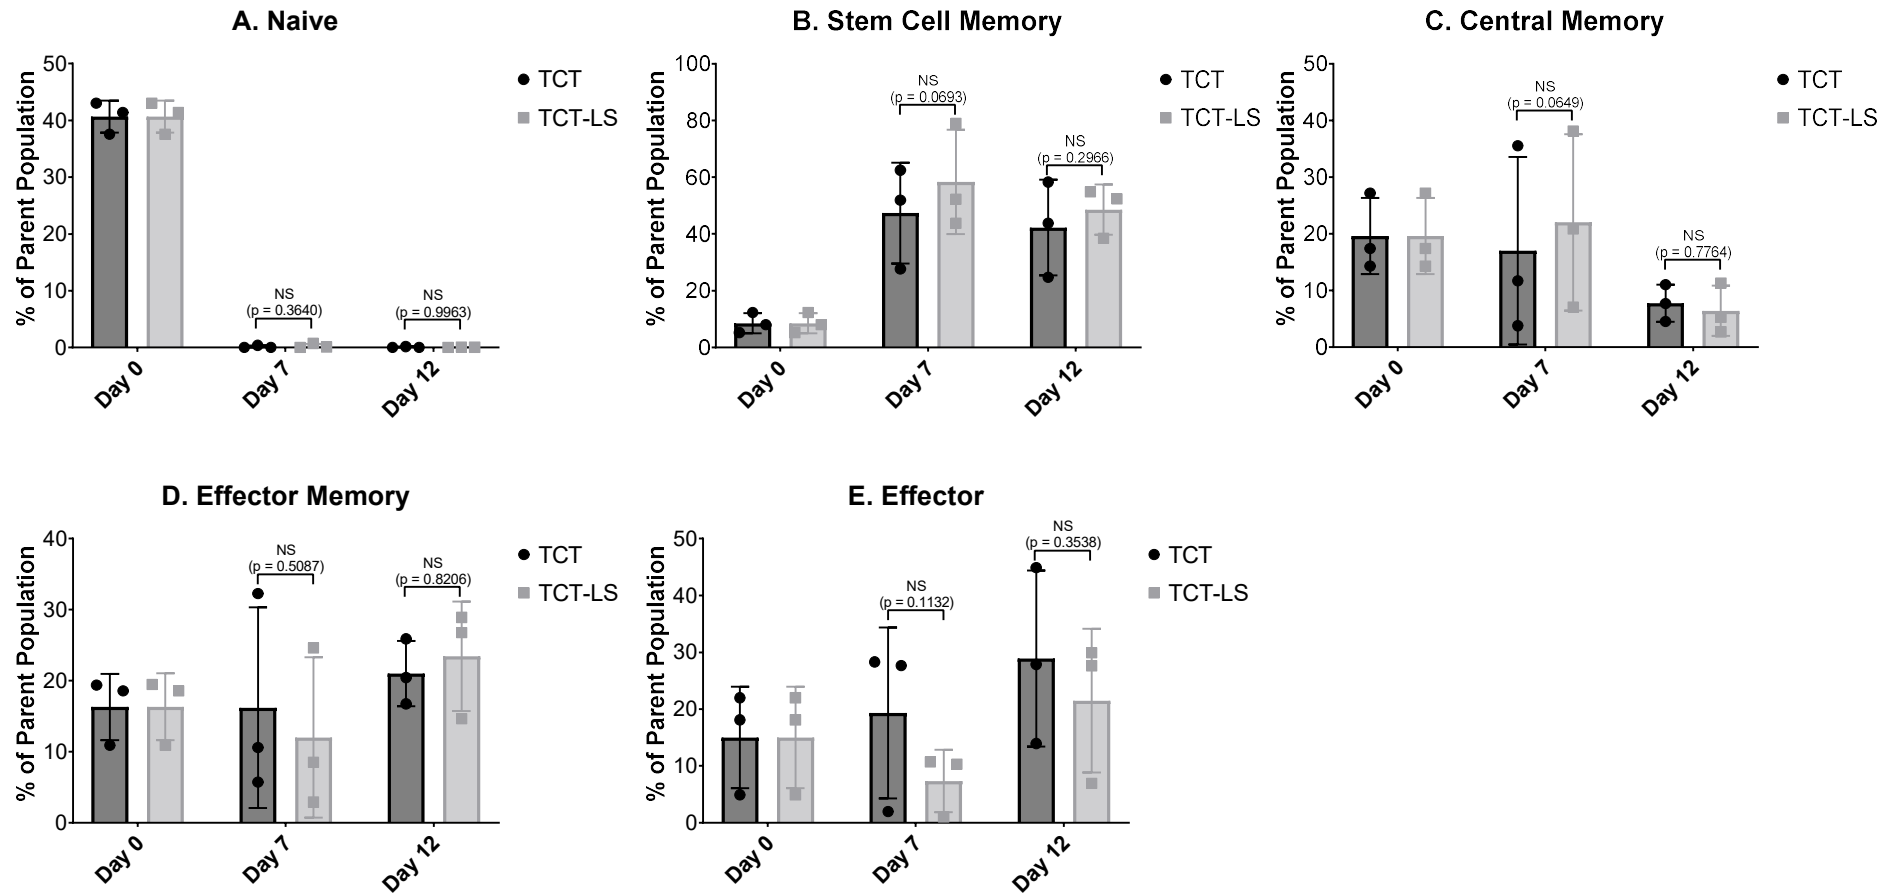

**Figure S8 Memory phenotype in TCT and TCT-LS Processes at days 0, 7 and 12 from T cells manufactured using either the TCT or TCT-LS process using cells from matched healthy donors (n = 3).** A: Naive T cells are present at day 0 but not at days 7 and 12; B: Stem cell memory T cells increase on days 7 and 12 compared to day 0; C: Central memory T cells decrease at day 12 compared to days 0 and 7; D: Effector memory T cells vary between time points; E: Effector T cells increase at day 12 compared to day 0. Two-way ANOVA with multiple comparisons shows no significant difference between TCT and TCT-LS processes at any time point (day 0 time point shows same data for both processes as the arms were divided after this time point). Graphs show individual data points with mean and standard deviation

## Supplemental Information

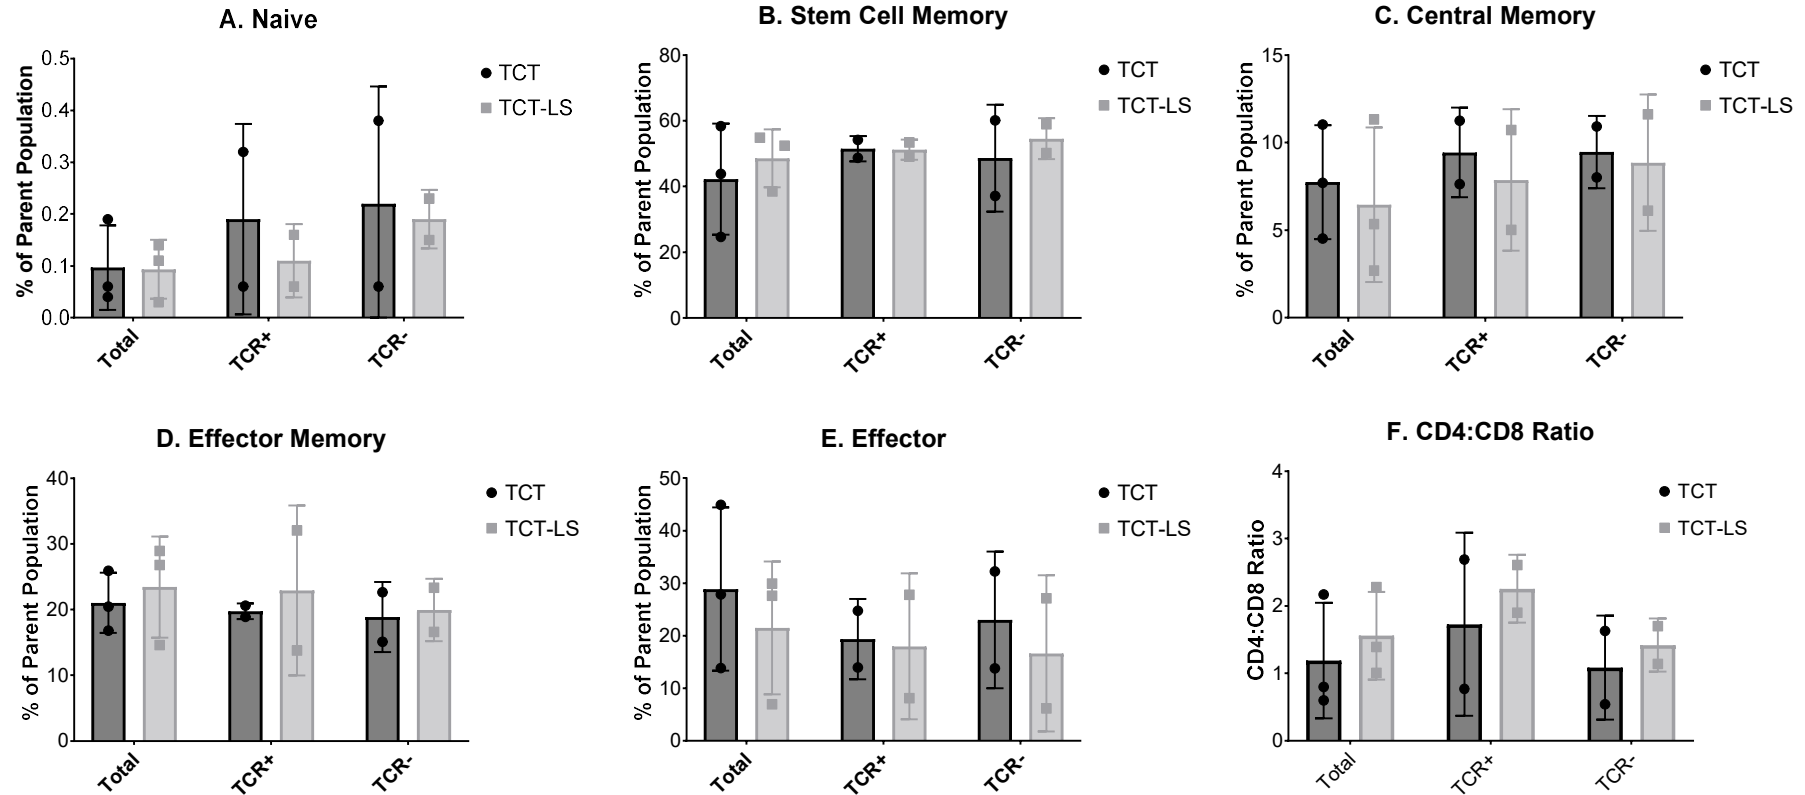

**Figure S9 Memory phenotype and CD4:CD8 ratio in TCT and TCT-LS Processes in total, transduced (TCR<sup>+</sup>) and untransduced (TCR<sup>-</sup>) populations at day 12 from T cells manufactured using either the TCT or TCT-LS process using cells from matched healthy donors (n = 3). A: Naive T cells; B: Stem cell memory T cells; C: Central memory T cells; D: Effector memory T cells; E: Effector T cells; F: CD4:CD8 ratio. Two-way ANOVA with multiple comparisons shows no significant difference between TCT and TCT-LS processes for any population. Graphs show individual data points with mean and standard deviation.**

## Supplemental Information

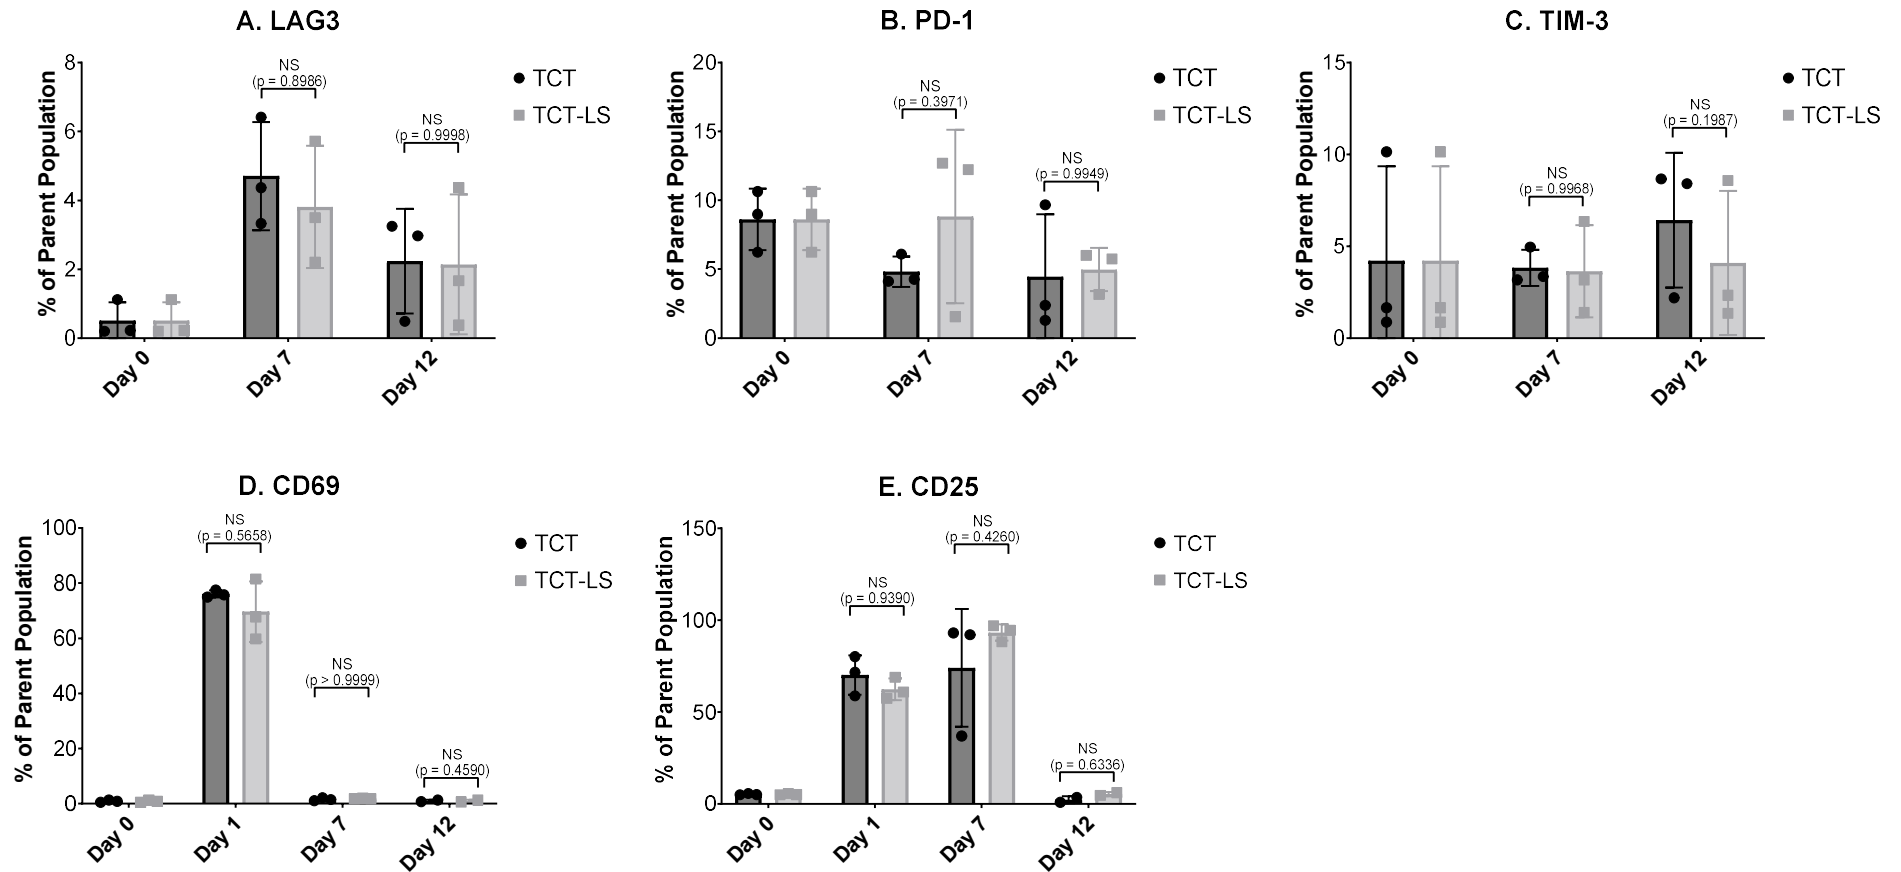

**Figure S10 Activation and Exhaustion Markers in TCT and TCT-LS Processes at days 0, 7 and 12 from T cells manufactured using either the TCT or TCT-LS process using cells from matched healthy donors (n = 3).** A: Expression of exhaustion marker LAG-3. B: Expression of exhaustion marker PD-1. C: Expression of exhaustion marker TIM-3. D: CD69 peaks at day 1. E: CD25 expression peaks at day 7 but is also upregulated at days 1 and 12. Two-way ANOVA with multiple comparisons shows no significant difference between TCT and TCT-LS processes at any time point. Graphs show individual data points with mean and standard deviation.
